# Supplementary material for: Comparing Tear Film Viscosity between Sjögren and Non-Sjögren Dry Eye Disease
Source: MDPI journal article supplement (doi:10.3390/life13071484), 2023-06-30
Supplement: s1 [file s1]

**Supplementary File S1:** Comparison of the momentary moving speed between male and female at representative time points.

| Characteristics of subjects | Male ( n = 9) | Female ( n = 27) | <i>P</i> value |
|-----------------------------|---------------|------------------|----------------|
| MMS (0.01 s)                | 35.05 ± 37.37 | 69.41 ± 77.67    | 0.2420         |
| MMS (0.05 s)                | 6.85 ± 4.95   | 9.93 ± 7.09      | 0.2005         |
| MMS (0.1 s)                 | 3.58 ± 1.92   | 4.59 ± 2.63      | 0.4009         |
| MMS (0.5 s)                 | 0.96 ± 0.30   | 0.89 ± 0.43      | 0.4650         |
| MMS (1.0 s)                 | 0.60 ± 0.31   | 0.46 ± 0.25      | 0.3077         |
| MMS (2.0 s)                 | 0.40 ± 0.31   | 0.25 ± 0.15      | 0.2005         |
| $\alpha$                    | 0.58 ± 0.11   | 0.46 ± 0.25      | 0.3077         |
| $\beta$                     | 0.91 ± 0.28   | 1.00 ± 0.30      | 0.2150         |

MMS = momentary moving speed. Mann-Whitney U test was used for the statistical analysis.
